# Supplementary material for: Systematic, multiparametric analysis of Mycobacterium tuberculosis intracellular infection offers insight into coordinated virulence
Source: PubMed Central journal article supplement (PMC5444860; doi:10.1371/journal.ppat.1006363), 2017-05-15
Supplement: ppat.1006363.s003.pdf [file ppat.1006363.s003.pdf]

### Screening strategy

Grow J774 macrophages  
in 96-well plates

Grow 2660 *Mtb* mutants and controls  
in 96-well plates in duplicate

Measure OD600 of mutants

Transfer 2660 mutants and controls  
in quadruplicates to macrophage plates

2406 analyzed by imaging phenotype (discarded 254 mutants with  $OD_{600} < 0.05$ )

361 mutants with intracellular growth defect

Perform multiplex cytokine  
Luminex analysis on  
361 mutants and WT

**113 mutants selected based  
on altered cytokine secretion  
from WT infected cells**

Confirm CFU of 71  
mutant hits

47 mutant hits confirmed by CFU  
24 mutant hits did not confirm by CFU  
15 mutant hits literature confirmed

**Perform multiparametric clustering analysis based on cytokine and imaging profiles**
