# Supplementary material for: Systematic, multiparametric analysis of Mycobacterium tuberculosis intracellular infection offers insight into coordinated virulence
Source: PubMed Central journal article supplement (PMC5444860; doi:10.1371/journal.ppat.1006363), 2017-05-15

S3 Fig

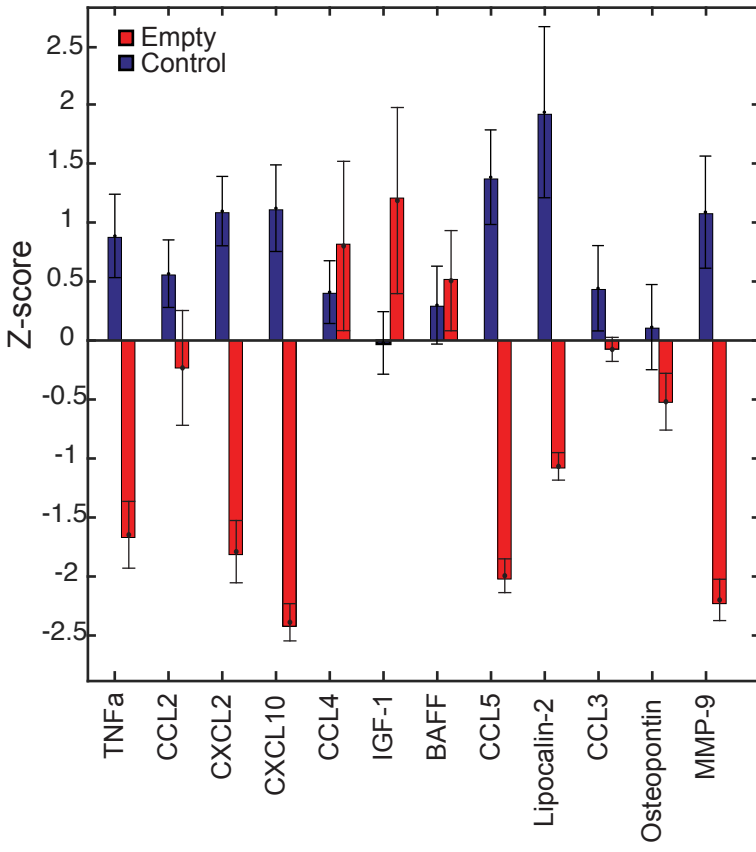

Supplement: ppat.1006363.s004.pdf [file ppat.1006363.s004.pdf]
