# Supplementary material for: Systematic, multiparametric analysis of Mycobacterium tuberculosis intracellular infection offers insight into coordinated virulence
Source: PLoS Pathog. 2017 May 15;13(5):e1006363. doi: 10.1371/journal.ppat.1006363 (PMC5444860; doi:10.1371/journal.ppat.1006363)
Supplement: S2 Table — (XLSX) [file ppat.1006363.s016.xlsx]

## Sheet: Sheet1
S2 Table. Hit mutants from high content imaging screen.
Rank (PC1)	Rv number	Gene Name	class (Tuberculist category)	function (Tuberculist description)	Hit in Rengarajan et al.	Hit in Brodin et al.	Hit in Pethe et al.
1	Rv1156		conserved hypothetical	unknown	no	no	no
2	Rv2786c	ribF	intermediary metabolism	FAD biosynthesis	no	no	no
3	Rv0583c	lpqN	cell wall cell process	probable conserved lipoprotein lpqN	no	no	no
4	Rv0253	nirD	intermediary metabolism	probable nitrite reductase	no	no	no
5	Rv0876c		conserved hypothetical	unknown	no	no	no
6	Rv1895		intermediary metabolism	unknown	no	no	no
7	Rv1221	sigE	information pathways	alternative RNA polymerase sigma factor SigE	no	no	no
8	Rv1105		intermediary metabolism	possible para-nitrobenyl esterase	no	no	no
9	Rv0766c	cyp123	intermediary metabolism	cytochrome P450 moooxygenase	no	no	no
10	Rv3873	PPE68	PE/PPE		no	no	no
11	Rv1591		cell wall cell process	unknown	no	no	no
12	Rv0579		conserved hypothetical	unknown	no	no	no
13	Rv1538c	ansA	intermediary metabolism	probable L-asparaginase	no	no	no
14	Rv3615c	espC	cell wall cell process	ESX-1 associated protein	no	no	no
15	Rv1567c		cell wall cell process	unknown	no	no	no
16	Rv2936	drrA	lipid metabolism	PDIM export	no	no	no
17	Rv0953c		intermediary metabolism	possible oxidoreductase	no	no	no
18	Rv0505	serB1	intermediary metabolism		no	no	no
19	Rv1688	mpg	information pathways	possible 3-methyladenine DNA glycosylase	no	no	no
20	Rv2402		conserved hypothetical	unknown	no	no	no
21	Rv3882c	eccE1	cell wall cell process	ESX-1 associated protein	no	no	no
22	Rv2740	ephG	virulence, detox	epoxide hydrolase- detox post oxidative damage	no	no	no
23	Rv3872	PE35	PE/PPE		no	no	no
24	Rv0097		intermediary metabolism	possible oxidoreductase, likely involved in cellular metaboism	no	no	no
25	Rv2385	mbtJ	lipid metabolism	mycobactin synthesis	no	no	no
26	Rv3347c	PPE55	PE/PPE		no	no	no
27	Rv2127	ansP1	cell wall cell process	L-arginine transport	no	no	no
28	Rv0152c	PE2	PE/PPE		no	no	no
29	Rv0940c		intermediary metabolism	possible oxidoreductase	no	no	no
30	Rv2243	fabD	lipid metabolism	malonyl-CoA-ACP transacylase activity	no	no	no
31	Rv3876	espI	cell wall cell process	ESX-1 associated protein	no	no	no
32	Rv0305c	PPE6	PE/PPE		no	no	no
33	Rv3883c	mycP1	cell wall cell process	Membrane-anchored mycosin (serine protease)	no	no	no
34	Rv0278c	PE_PGRS3	PE/PPE		no	no	no
35	Rv1498A		conserved hypothetical	unknown	no	no	no
36	Rv1962c	vapC35	virulence, detox	toxin/antitoxin	no	no	no
37	Rv3334		regulatory protein	transcriptional regulator	no	no	no
38	Rv0967	csoR	regulatory protein	represses copper sensitive operon	no	no	no
39	Rv2577		conserved hypothetical	unknown	no	no	no
40	Rv1957		conserved hypothetical	unknown	no	no	no
41	Rv1825		cell wall cell process	unknown	no	no	no
42	Rv1304	atpB	intermediary metabolism	part of the proton channel, ? Proton transport across the membrane	no	no	no
43	Rv0888		cell wall cell process	unknown	no	no	no
44	Rv1435c		cell wall cell process		no	no	no
45	Rv3869	eccB1	cell wall cell process	ESX-1	no	no	no
46	Rv3121	cyp141	intermediary metabolism		no	no	no
47	Rv0934	pstS1	cell wall cell process	periplasmic phosphate-binding lipoprotein	no	no	no
48	Rv2346c	esxO	cell wall cell process	putative ESAT-6 like protein	no	no	no
49	Rv0329c		conserved hypothetical	unknown	no	no	no
50	Rv0585c		cell wall cell process	unknown	no	no	no
51	Rv1503c		conserved hypothetical	unknown	no	yes	no
52	Rv1814	erg3	lipid metabolism	Membrane-bound C-5 sterol desaturase	no	no	no
53	Rv2998		conserved hypothetical	unknown	no	no	no
54	Rv3324c	moaC3	intermediary metabolism	? Involved in biosynthesis of molybdopterin	no	no	no
55	Rv2206		cell wall cell process	unknown	yes	no	no
56	Rv1470	trxA	intermediary metabolism	probable thioredoxin	no	no	no
57	Rv1131	prpC	intermediary metabolism	methylcitrate synthase PrpC	no	no	no
58	Rv1474c		regulatory protein	probable transcriptional regulation	no	no	no
59	Rv3230c		intermediary metabolism	hypothetical oxidoreductase	no	no	no
60	Rv2626c	hrp1	conserved hypothetical	unknown- hypoxic response protein 1	no	no	no
61	Rv3815c		intermediary metabolism	possible acyltransferase	no	no	no
62	Rv3841	bfrB	intermediary metabolism	bacterioferritin	no	no	no
63	Rv1452c	PE_PGRS28	PE/PPE		no	no	no
64	Rv0620	galK	intermediary metabolism	Probable galactokinase GalK	no	no	no
65	Rv3071		conserved hypothetical	unknown	no	no	no
66	Rv1082	mca	virulence, detoxification	mycothiol dependent detox	no	no	no
67	Rv2675c		conserved hypothetical	unknown	no	no	no
68	Rv2963		cell wall cell process	probable integral membrane protein	no	no	no
69	Rv2199c		cell wall cell process	unknown	no	no	no
70	Rv0782	ptrBb	intermediary metabolism	Probable protease I	no	no	no
71	Rv3735		conserved hypothetical	unknown	no	no	no
72	Rv3305c	amiA1	intermediary metabolism	Possible N-acyl-L-amino acid amidohydrolase	no	no	no
73	Rv3082c	virS	virulence, detox	virulence regulating transcriptional regulator	no	no	no
74	Rv2796c	lppV	conserved hypothetical	unknown- probable conserved lipoprotein	no	no	no
75	Rv3539	PPE63	PE/PPE		no	no	no
76	Rv1625c	cya	intermediary metabolism	cAMP synthesis	no	no	no
77	Rv2976c	ung	information pathways	prpbable uracil-DNA glycosylase	no	no	no
78	Rv1672c		cell wall cell process	membrane transport	no	no	no
79	Rv2939	papA5	lipid metabolism	PDIM synthesis	no	no	no
80	Rv1765c		conserved hypothetical	unknown	no	no	no
81	Rv1742		cell wall cell process	unknoen	no	no	no
82	Rv1200		cell wall cell process	probable integral membrane transport	no	no	no
83	Rv1146	mmpL13b	cell wall cell process	thought to be involved in fatty acid transport	no	no	no
84	Rv3685c	cyp137	intermediary metabolism	p450 monooxygenase	no	no	no
85	Rv1886c	fbpB	lipid metabolism	mycolyltransferase 85B	no	no	no
86	Rv1751		intermediary metabolism	probable oxidoreductase	no	no	no
87	Rv3094c		conserved hypothetical	unknown	no	no	no
88	Rv3057c		intermediary metabolism		no	no	no
89	Rv0146		conserved hypothetical	unknown-possible methyltransferase	no	no	no
90	Rv2948c	fadD22	lipid metabolism		no	no	no
91	Rv3704c	gshA	intermediary metabolism	glutamate-cysteine ligase	no	no	no
92	Rv0096	PPE1	PE/PPE		yes	no	no
93	Rv2701c	suhB	virulence, detox	inositol-1-monophosphatase	no	no	no
94	Rv1317c	alkA	information pathways	Probable bifunctional regulatory protein and DNA repair enzyme AlkA	no	no	no
95	Rv1352		conserved hypothetical	unknown	no	no	no
96	Rv0813c		conserved hypothetical	unknown	no	no	no
97	Rv1950c		conserved hypothetical	unknown	no	no	no
98	Rv1882c		intermediary metabolism	Probable short-chain type dehydrogenase/reductase	no	no	no
99	Rv0622		cell wall cell process	unknown	no	no	no
100	Rv2450c	rpfE	cell wall cell process	probable RPF	no	no	no
101	Rv0107c	ctpI	cell wall cell process	cation transporting ATPase	yes	no	no
102	Rv1764		insertion sequence		no	no	no
103	Rv0432	sodC	virulence, detox	periplasmid SOD	no	no	no
104	Rv2566		conserved hypothetical	unknown	no	no	no
105	Rv1809	PPE33	PE/PPE		no	no	no
106	Rv0573c	pncB2	intermediary metabolism	NAD salvage/phosphoryboxylation of nicotininc acid	no	no	no
107	Rv1913		conserved hypothetical	unknown	no	no	no
108	Rv3907c	pcnA	information pathways	probable poly A polymerase RNA adenylating enzyme	no	no	no
109	Rv0303		intermediary metabolism	probable dehydrogenase/reductase	no	no	no
110	Rv1238	sugC	cell wall cell process	Probable sugar-transport ATP-binding protein ABC transporterÊ	yes	no	no
111	Rv0039c		cell wall cell process	unknown	no	no	no
112	Rv0907		cell wall cell process	unknown	no	no	no
113	Rv3176c	mesT	virulence, detox	epoxide hydrolase	no	no	no
114	Rv0332		conserved hypothetical	unknown	no	no	no
115	Rv2446c		cell wall cell process	unknown	no	no	no
116	Rv2634c	PE_PGRS46	PE/PPE		no	no	no
117	Rv0419	lpqM	cell wall cell process	possible lipoprotein peptidase	no	no	no
118	Rv2356c	PPE40	PE/PPE		no	no	no
119	Rv1176c		conserved hypothetical	unknown	no	no	no
120	Rv0634A		conserved protein	unknown	no	no	no
121	Rv3545c	cyp125	intermediary metabolism	P450 monooxygenase	no	no	no
122	Rv1865c		intermediary metabolism	Probable short-chain type dehydrogenase	no	no	no
123	Rv1199c		insertion sequence		no	no	no
124	Rv1840c	PE-PGRS34	PE/PPE		no	no	no
125	Rv1759c	wag22	PE/PPE		no	no	no
126	Rv2949c		intermediary metabolism	Chorismate pyruvate lyase	no	no	no
127	Rv3656c		conserved hypothetical	unknown	no	no	no
128	Rv1922		cell wall cell process	probable conserved lipoprotein	no	no	no
129	Rv3453		cell wall cell process	possible conserved transmembrane protein	no	no	no
130	Rv1798	eccA5	cell wall cell process	part of ESX5	no	no	no
131	Rv1045		conserved hypothetical	unknown	yes	no	no
132	Rv3658c		cell wall cell process	unknown	no	no	no
133	Rv1618	tesB1	lipid metabolism	probable acyl-CoA thioesterase (fatty acid metabolism)	no	no	no
134	Rv0365c		conserved hypothetical	unknown	no	no	no
135	Rv2054		conserved hypothetical	unknown	no	no	no
136	Rv3674c	nth	information pathways	Probable endonuclease III Nth (DNA-(apurinic or apyrimidinic site)lyase) (AP lyase) (AP endonuclease class I)Ê	no	no	no
137	Rv2933	ppsC	lipid metabolism	PDIM synthesis	no	no	no
138	Rv3785		conserved hypothetical	unknown	no	no	no
139	Rv0624	vapC30	virulence, detox	toxin part of toxin antitoxin	no	no	no
140	Rv0133		intermediary metabolism	acetylation, substrate unknown	no	no	no
141	Rv2234	ptpA	regulatory protein	Phosphotyrosine protein phosphatase PtpA	no	no	no
142	Rv3125c	PPE49	PE/PPE		no	no	no
143	Rv1763		insertion sequence		no	no	no
144	Rv3351c		conserved hypothetical	unknown	no	no	no
145	Rv1557	mmpL6	cell wall cell process	thought to be involved in fatty acid transport	no	no	no
146	Rv1359		regulatory protein	transcriptional regulation	no	no	no
147	Rv2295		conserved hypothetical	unknown	no	yes	no
148	Rv2387		conserved hypothetical	unknown	no	no	no
149	Rv1433		cell wall cell process	possible conserved exported protein	no	no	no
150	Rv0647c		conserved hypothetical	unknown	no	no	no
151	Rv3368c		intermediary metabolism	possible oxidoreductase	no	no	no
152	Rv2133c		conserved hypothetical		no	no	no
153	Rv0547c		intermediary metabolism	possible oxidoreductase	no	no	no
154	Rv3831		conserved hypothetical	unknown	no	no	no
155	Rv0678		conserved protein	unknown	no	no	no
156	Rv2368c	phoH1	intermediary metabolism	phosphate starvation-inducible protein- fxn unknown	no	no	no
157	Rv1517		cell wall cell process	unknown	no	no	no
158	Rv2123	PPE7	PE/PPE		no	no	no
159	Rv1753c	PPE24	PE/PPE		no	no	no
160	Rv0406c		conserved hypothetical	unknown	no	no	no
161	Rv0771		intermediary metabolism	possible 4-carboxymuconolactine decarboxylase	no	no	no
162	Rv1396c	PE_PGRS25	PE/PPE		no	no	no
163	Rv2934	ppsD	lipid metabolism	PDIM synthesis	no	no	no
164	Rv3316	sdhC	intermediary metabolism	probable succinase dehydrogenase	no	no	no
165	Rv3839		conserved hypothetical	unknown	no	no	no
166	Rv2029c	pfkB	intermediary metabolism	6-phosphofructokinase PfkB	no	no	no
167	Rv3695		cell wall cell process	unknown	no	no	no
168	Rv2056c	rpsN2	information pathways	ribosomal protein	no	no	no
169	Rv3323c	moaX	intermediary metabolism	molybdenum cofactor biosynthesis	no	no	no
170	Rv1323	fadA4	lipid metabolism	lipid degradation	no	no	no
171	Rv0300	vapB2	virulence, detox	possible antitoxin	no	no	no
172	Rv0518		cell wall cell process	possible exported protein	no	no	no
173	Rv1549	fadD11.1	lipid metabolism	possible fatty acid CoA ligase	no	no	no
174	Rv1900c	lipJ	intermediary metabolism	probable lignin peroxidase	no	no	no
175	Rv3296	lhr	information pathways	ATPase and helicase	no	no	no
176	Rv3766		conserved hypothetical	unknown	no	no	no
177	Rv2453c	mobA	intermediary metabolism	molybdenum cofactor biosynthesis- Probable molybdopterin-guanine dinucleotide biosynthesis protein A	no	no	no
178	Rv1894c		conserved hypothetical	unknown	no	no	no
179	Rv0945		intermediary metabolism	probable short-chain type dehydrogenase reductase	no	no	no
180	Rv2038c		cell wall cell process	probable sugar transport ATP-binding protein ABC transporter	no	no	no
181	Rv0222	echA1	lipid metabolism	probable enoyl CoA hydratase	no	no	no
182	Rv1477	ripA	virulence, detox	peptidoglycan hydrolase	no	no	no
183	Rv2044c		conserved hypothetical	unknown	no	no	no
184	Rv0532	PE_PGRS6	PE/PPE	unknown	no	no	no
185	Rv1857	modA	cell wall cell process	probable mlybdate binding lipoprotein	no	no	no
186	Rv3870	eccCa1	cell wall cell process	ESX-1 associated protein	no	no	no
187	Rv3770c		conserved hypothetical	unknown	no	no	no
188	Rv1057		conserved hypothetical	unknown	no	no	no
189	Rv2943		insertion sequence		no	no	no
190	Rv1872c	lldD2	intermediary metabolism	possible L-lactate dehydrogenase (respiration)	no	no	no
191	Rv0248c	shdA	intermediary metabolism	probable succinate dehydrogenase	no	no	no
192	Rv0453	PPE11	PE/PPE	unknown	no	no	no
193	Rv0454		conserved hypothetical	unknown	no	no	no
194	Rv1963c	mce3R	regulatory protein	probable transcriptional repressor	no	no	no
195	Rv3544c	fadE28	lipid metabolism	probable acyl-CoA dehydrogenase	yes	no	no
196	Rv0103c	ctpB	cell wall cell process	probable cation-transporter P-type ATPase B	no	no	no
197	Rv1843c	guaB1	intermediary metabolism	GMP biosynthesis- inosine 5' monophosphate dehydrogenase	no	no	no
198	Rv1341		conserved hypothetical	unknown	no	no	no
199	Rv0751c	mmsB	intermediary metabolism	probable 3-hydroxyisobutyrate dehydrogenase	no	no	no
200	Rv0965c		conserved hypothetical	unknown	no	no	no
201	Rv1801	PPE29	PE/PPE	unknown	no	no	no
202	Rv0630c	recB	information pathways	probable exonuclease V	no	no	no
203	Rv2469c		conserved hypothetical	unknown	no	no	no
204	Rv3004	cfp6	cell wall cell process	protein antigen 6	no	no	no
205	Rv2466c		conserved hypothetical	unknown	no	no	no
206	Rv2315c		conserved hypothetical	unknown	no	no	no
207	Rv2176	pknL	regulatory protein	probable transmembrane serine-threonine protein kinase L	no	no	no
208	Rv1157c		conserved hypothetical	unknown	no	no	no
209	Rv2685	arsB1	cell wall cell process	probable arsenic transport integral membrane transpoprt	no	no	no
210	Rv3226c		conserved hypothetical	unknown	no	no	no
211	Rv0079		conserved hypothetical	unknown	no	no	no
212	Rv0148		intermediary metabolism	probable short-chain type dehydrogenase reductase	no	no	no
213	Rv3908	mutT4	information pathways	possible mutator protein	no	no	no
214	Rv0659c	mazF2	virulence, detox	toxin	no	no	no
215	Rv0198c	zmp1	intermediary metabolism	unknown- probable zinc metalloprotease	no	no	no
216	Rv3197		cell wall cell process	probable conserved ATP binding protein ABC transporter	no	no	no
217	Rv3560c	fadE30	lipid metabolism	lipid degradation	yes	no	no
218	Rv2001		conserved hypothetical	unknown	no	no	no
219	Rv1936		intermediary metabolism	possible monooxygenase	no	no	no
220	Rv1425		conserved hypothetical	unknown	no	no	no
221	Rv2885c		insertion sequence		no	no	no
222	Rv3563	fadE32	lipid metabolism	lipid degradation	yes	no	no
223	Rv2558		conserved hypothetical	unknown	no	no	no
224	Rv1575		insertion sequence		no	no	no
225	Rv0740		conserved hypothetical	unknown	no	no	no
226	Rv3595c	PE_PGRS59	PE/PPE		no	no	no
227	Rv3516	echA19	lipid metabolism	possible enoyl-CoA hydratase	no	no	no
228	Rv2735c		conserved hypothetical	unknown	no	no	no
229	Rv1162	narH	intermediary metabolism	probable rspiratory nitrate reductase	no	no	no
230	Rv0611c		conserved hypothetical	unknown	no	no	no
231	Rv1769		conserved hypothetical	unknown	no	no	no
232	Rv3216		conserved hypothetical	GCN5-related N-aceetyltransferase, pseudogene	no	no	no
233	Rv3174		intermediary metabolism	Probable short-chain type dehydrogenase/reductase	no	no	no
234	Rv0218		cell wall cell process	unknown	no	no	no
235	Rv1899c	lppD	cell wall cell process	possible lipoprotein	no	no	no
236	Rv1272c		cell wall cell process	probable drug-transport transmembrane AT_binding protein ABC transporter	no	no	no
237	Rv0086	hycQ	intermediary metabolism	possible hydrogenase hycQ	no	no	no
238	Rv3693		cell wall cell process	possible conserved membrane protein	no	no	no
239	Rv3272		conserved hypothetical	unknown	no	no	no
240	Rv1887		conserved hypothetical	unknown	no	no	no
241	Rv2481c		conserved hypothetical	unknown	no	no	no
242	Rv0490	senX3	regulatory protein	part of two component regulator sensor histidine kinase	no	no	no
243	Rv0845		regulatory protein	probable sensor part of two component regulator	no	no	no
244	Rv2333c	stp	cell wall cell process	integral membrane drug efflux protein	no	no	no
245	Rv1008	tatD	cell wall cell process	probable deoxyribonuclease	no	no	no
246	Rv2307B		conserved hypothetical	unknown	no	no	no
247	Rv2035		conserved hypothetical	unknown	no	no	no
248	Rv2771c		conserved hypothetical	unknown	no	no	no
249	Rv0610c		conserved hypothetical	unknown	no	no	no
250	Rv3099c		conserved hypothetical	unknown	no	no	no
251	Rv2073c		intermediary metabolism	probable shortchain dehydrogenase	no	no	no
252	Rv0233	nrdB	information pathways	DNA replication- Ribonucleoside-diphosphate reductase (beta chain)	no	no	no
253	Rv1683		lipid metabolism	possible bifunctional enzyme- long chain acyl-CoA synthase and lipase	no	no	no
254	Rv3669		cell wall cell process	probable conserved transmembrane protein	no	no	no
255	Rv1266c	pknH	regulatory protein	probable transmembrane serine-threonine protine kinase PknH	no	no	no
256	Rv1944c		conserved hypothetical	unknown	no	no	no
257	Rv1084		conserved hypothetical	unknown	no	no	no
258	Rv1607	chaA	cell wall cell process	ion transport across the membrane. ? Calcium.	no	no	no
259	Rv3895c	eccB2	cell wall cell process	ESX2 associated	no	no	no
260	Rv1036c		insertion sequence	probable transposase	no	no	no
261	Rv0770		intermediary metabolism	probable dehydrogenase/reductase	no	no	no
262	Rv1289		conserved hypothetical	unknown	no	no	no
263	Rv0220	lipC	intermediary metabolism	lipolytic enzyme probably involved in cellular metabolism	no	no	no
264	Rv3534c	hsaF	intermediary metabolism	probable 4-hydroxy-2-oxovalerate aldolase	no	no	no
265	Rv1468c	PE_PGRS29	PE/PPE	unknown	no	no	no
266	Rv2051c	ppm1	cell wall cell process	polyprenol-monophosphomannose synthase	no	no	no
267	Rv0852	fadD16	lipid metabolism	lipid degradation	no	no	no
268	Rv0142		conserved hypothetical	unknown	no	no	no
269	Rv2965c	kdtB	intermediary metabolism	probable phosphopantetheine adenylyltransferase	no	no	no
270	Rv1492	mutA	lipid metabolism	probable methylmalonyl-CoA mutase small subunit	no	no	no
271	Rv1118c		conserved hypothetical	unknown	no	no	no
272	Rv3667	acs	lipid metabolism	acetyl coenzyme A synthetase	no	no	no
273	Rv1774		intermediary metabolism	probable oxidoreductase	no	no	no
274	Rv0756c		conserved hypothetical	unknown	no	no	no
275	Rv0168	yrbE1B	virulence, detox	conserved integral membrane protein	no	no	no
276	Rv2859c		intermediary metabolism	unknown	no	no	no
277	Rv2745c	clgR	regulatory protein	transcriptional regulator	no	no	no
278	Rv2404c	lepA	intermediary metabolism	probable GTP-binding protein	no	no	no
279	Rv0650		intermediary metabolism	probably involved in specific sugar metabolism or regulation	no	no	no
280	Rv0626	vapB5	virulence, detox	antitoxin	no	no	no
281	Rv3438		conserved hypothetical	unknown	no	no	no
282	Rv3524		cell wall cell process	unknown	no	no	no
283	Rv3449	mycP4	intermediary metabolism	probable membrane anchoired mycosin	no	no	no
284	Rv2820c		conserved hypothetical	unknown	no	no	no
285	Rv2803		conserved hypothetical	unknown	no	no	no
286	Rv1537	dinX	information pathways	involved in DNA metabolism	no	no	no
287	Rv1902c	nanT	cell wall cell process	probable sialic acid transport integral membrane protein	no	no	no
288	Rv1074c	fadA3	lipid metabolism	probable beta ketoacyl CoA thiolase	no	no	no
289	Rv1388	mihF	information pathways	putative integration host factor	no	no	no
290	Rv2075c		cell wall cell process	possible hypotehtical exported or envelope protein	no	no	no
291	Rv1841c		cell wall cell process	unknown	no	no	no
292	Rv2797c		conserved hypothetical	unknown	no	no	no
293	Rv2536		cell wall cell process	unknown	no	no	no
294	Rv2209		cell wall cell process	unknown	no	no	no
295	Rv2938	drrC	cell wall cell process	PDIM transport	no	no	no
296	Rv2607	pdxH	intermediary metabolism	vitamin B6 synthesis	no	no	no
297	Rv0463		cell wall cell process	probable conserved membrane protein	no	no	no
298	Rv1637c		conserved hypothetical	unknown	no	no	no
299	Rv0574c		conserved hypothetical	unknown	no	no	no
300	Rv3242c		conserved hypothetical	unknown	no	no	no
301	Rv2431c	PE25	PE/PPE	unknown	no	no	no
302	Rv3377c		intermediary metabolism	halimadienyl diphosphate	no	no	yes
303	Rv0908	ctpE	cell wall cell process	probable metal cation transporter ATPase	no	no	no
304	Rv1179c		conserved hypothetical	unknown	no	no	no
305	Rv0712		conserved hypothetical	unknown	no	no	no
306	Rv0587	yrbE2A	virulence, detox	integral membrane protein, part of mce2 operon	no	no	no
307	Rv2926c		conserved hypothetical	unknown	no	no	no
308	Rv0271c	fadE6	lipid metabolism	lipid degradation	no	no	no
309	Rv0959		conserved hypothetical	unknown	no	no	no
310	Rv1041c		insertion sequence	probable like 2 transposase	no	no	no
311	Rv3026c		conserved hypothetical	unknown	no	no	no
312	Rv2893		intermediary metabolism	possible oxidoreductase	no	no	no
313	Rv3820c	papA2	lipid metabolism	possible conserved polyketide synthase associated protein PapA2	no	no	no
314	Rv2546	vapC18	virulence, detox	possible toxin	no	no	no
315	Rv3487c	lipF	intermediary metabolism	lipolytic enzyme probably involved in cellular metabolism	no	no	no
316	Rv3225c		intermediary metabolism	GCN5-related N-acetyltransferase, phosphorylase	no	no	no
317	Rv0857		conserved hypothetical	unknown	no	no	no
318	Rv0135c		regulatory protein	possible transcriptional regulator	no	no	no
319	Rv0010c		cell wall cell process	unknown	yes	no	no
320	Rv3920c		cell wall cell process	unknown	no	no	no
321	Rv1101c		conserved hypothetical	unknown	no	no	no
322	Rv0830		conserved hypothetical	unknown	no	no	no
323	Rv0793		intermediary metabolism	possible monooxygenase	no	no	no
324	Rv0842		cell wall cell process	probable conserved integral membrane protein	no	no	no
325	Rv1355c	moeY	intermediary metabolism	possible molybdopterin biosynthesis protein	no	no	no
326	Rv1231c		cell wall cell process	probable membrane protein	no	no	no
327	Rv3842c	glpQ1	intermediary metabolism	glycerophophoryldieaser phosphodiesterases	yes	no	no
328	Rv0514		cell wall cell process	unknown- possible transmembrane protein	no	no	no
329	Rv2473		cell wall cell process	unknown	no	no	no
330	Rv1687c		cell wall cell process	probable conserved ATP-binding protein ABC transporter	no	no	no
331	Rv2957		intermediary metabolism	unknown	no	no	no
332	Rv1290A		conserved hypothetical	unknown	no	no	no
333	Rv1152		regulatory protein	probable transcriptional regulatory protein	no	no	no
334	Rv3604c		cell wall cell process	probable conserved transmembrane protein	no	no	no
335	Rv3293	pcd	intermediary metabolism	probable piperideine 6 carboxilic acid dehydrogenase	no	no	no
336	Rv0989c	grcC2	intermediary metabolism	probable polyprenul-diphosphate synthase	no	no	no
337	Rv3300c		conserved hypothetical	unknon	no	no	no
338	Rv3017c	esxQ	cell wall cell process		no	no	no
339	Rv2449c		conserved hypothetical	unknown	no	no	no
340	Rv3795	embB	cell wall cell process	cell wall arabinan resistance	no	no	no
341	Rv3514	PE_PGRS57	PE/PPE	unknown	no	no	no
342	Rv2989		regulatory protein	probable transcriptional regulator	no	no	no
343	Rv1049		regulatory protein	transcriptional repressor	yes	no	no
344	Rv2048c	pks12	lipid metabolism	pks12	no	no	no
345	Rv2728c		conserved hypothetical	unknown	no	no	no
346	Rv1506c		conserved hypothetical	unknown	no	yes	no
347	Rv1488		cell wall cell process	unknown	no	no	no
348	Rv3447c	eccC4	cell wall cell process	ESX-4 component	no	no	no
349	Rv1583c		conserved hypothetical	propbable phiRv1 phage protein	no	no	no
350	Rv0787		conserved hypothetical	unknown	no	no	no
351	Rv2557		conserved hypothetical	unknown	no	no	no
352	Rv1935c	echA13	lipid metabolism	possible enoyl CoA hydratase	no	no	no
353	Rv3060c		regulatory protein	transcriptional regulator	no	no	no
354	Rv0836c		conserved hypothetical	unknown	no	no	no
355	Rv0614		conserved hypothetical	unknown	no	no	no
356	Rv1397c	vapC10	virulence, detox	possible toxin	no	no	no
357	Rv3400		intermediary metabolism	probable hydrolase	no	no	no
358	Rv0776c		conserved hypothetical	unknown	no	no	no
359	Rv1106c		intermediary metabolism	3-beta hydroxysteroid dehydrogenase	no	no	no
360	Rv1582c		insertion sequence	probable phiRv1 phage protein	no	no	no
361	Rv2775		conserved hypothetical	unknown	no	no	no
