# Supplementary material for: Systematic, multiparametric analysis of Mycobacterium tuberculosis intracellular infection offers insight into coordinated virulence
Source: PLoS Pathog. 2017 May 15;13(5):e1006363. doi: 10.1371/journal.ppat.1006363 (PMC5444860; doi:10.1371/journal.ppat.1006363)
Supplement: S5 Table — (XLSX) [file ppat.1006363.s019.xlsx]

## Sheet: Sheet1
S5 Table. Multiparametric clustering of selected hit mutants.
Cluster	Rv number	Gene name
I	Rv0907	Rv0907
II	Rv0148	Rv0148
II	Rv0647c	Rv0647c
II	Rv0965c	Rv0965c
II	Rv2029c	pfkB
II	Rv0142	Rv0142
II	Rv0453	PPE11
II	Rv0793	Rv0793
II	Rv1618	tesB1
II	Rv1865c	Rv1865c
II	Rv3695	Rv3695
II	Rv0547c	Rv0547c
II	Rv0876c	Rv0876c
II	Rv1289	Rv1289
II	Rv0766c	cyp133
II	Rv3447c	eccC4
II	Rv1763	Rv1763
II	Rv3831	Rv3831
II	Rv0587	yrbE2A
II	Rv1575	Rv1575
II	Rv1396c	PE_PGRS25
II	Rv0583c	lpqN
II	Rv3534c	hsaF
II	Rv1895	Rv1895
II	Rv2675c	Rv2675c
II	Rv3545c	cyp125
II	Rv1041c	Rv1041c
II	Rv0940c	Rv0940c
II	Rv3334	Rv3334
II	Rv2885c	Rv2885c
II	Rv1751	Rv1751
II	Rv3368c	Rv3368c
II	Rv0039c	Rv0039c
II	Rv2449c	Rv2449c
II	Rv1963c	mce3R
II	Rv2949c	Rv2949c
II	Rv3323c	moaX
II	Rv3908	mutT4
III	Rv0332	Rv0332
III	Rv1607	chaA
III	Rv3300c	Rv3300c
III	Rv3004	cfp6
IV	Rv0303	Rv0303
IV	Rv0620	galK
IV	Rv0751c	mmsB
IV	Rv1765c	Rv1765c
IV	Rv2346c	esxO
IV	Rv0622	Rv0622
IV	Rv0888	Rv0888
IV	Rv3216	Rv3216
IV	Rv2038c	Rv2038c
IV	Rv0329c	Rv0329c
IV	Rv2934	ppsD
IV	Rv0678	Rv0678
IV	Rv3324c	moaC3
IV	Rv3656c	Rv3656c
IV	Rv1688	mpg
IV	Rv0406c	Rv0406c
IV	Rv1146	mmpL13b
IV	Rv2939	papA5
IV	Rv3872	PE35
IV	Rv3873	PPE68
IV	Rv1082	mca
IV	Rv2803	Rv2803
IV	Rv1625c	cya
IV	Rv1477	ripA
IV	Rv2123	PPE7
IV	Rv0813c	Rv0813c
IV	Rv3125c	PPE49
IV	Rv3438	Rv3438
IV	Rv0233	nrdB
IV	Rv1637c	Rv1637c
IV	Rv1231c	Rv1231c
IV	Rv1582c	Rv1582c
IV	Rv1801	PPE29
IV	Rv2450c	rpfE
IV	Rv3785	Rv3785
IV	Rv0103c	ctpB
IV	Rv1304	atpB
IV	Rv2989	Rv2989
IV	Rv1074c	fadA3
IV	Rv1944c	Rv1944c
IV	Rv2685	arsB1
IV	Rv2943	Rv2943
IV	Rv0432	sodC
IV	Rv1036c	Rv1036c
IV	Rv3351c	Rv3351c
IV	Rv3296	lhr
IV	Rv2933	ppsC
IV	Rv3842c	glpQ1
IV	Rv2775	Rv2775
IV	Rv0152c	PE2
IV	Rv2243	fabD
IV	Rv0096	PPE1
IV	Rv2976c	ung
IV	Rv3669	Rv3669
IV	Rv3870	eccCa1
V	Rv0712	Rv0712
V	Rv3869	eccB1
V	Rv0771	Rv0771
V	Rv1176c	Rv1176c
V	Rv2938	drrC
V	Rv3615c	espC
V	Rv0505c	serB1
V	Rv3815c	Rv3815c
V	Rv3882c	eccE1
V	Rv2626c	hrp1
V	Rv1105	Rv1105
V	Rv1538c	ansA
V	Rv2936	drrA
V	Rv3876	espI
V	Rv3883c	mycP1
